# Supplementary material for: Intrinsically conducting polyaminoanthraquinone nanofibrils: interfacial synthesis, formation mechanism and lead adsorbents
Source: Royal Society of Chemistry journal article supplement (doi:10.1039/c4ra07423h), 2014-01-01
Supplement: c4ra07423h1.pdf [file c4ra07423h1.pdf]

## Electronic Supplementary Information

# Intrinsically conducting polyaminoanthraquinone nanofibrils: Interfacial synthesis, formation mechanism and lead adsorbents

Shao-Jun Huang,<sup>\*a</sup> Chun-Gang Min,<sup>a</sup> Yaozu Liao,<sup>\*b,d</sup> Ping Du,<sup>a</sup> Hui Sun,<sup>a</sup> Yan-Qin Zhu<sup>a</sup> and Ai-Min Ren<sup>c</sup>

<sup>a</sup> Research Center for Analysis and Measurement, Kunming University of Science and Technology, Kunming, 650093, China. Fax: +86-871-65111617; Tel: +86-871-65113971; E-mail: [huangshaojun1975@163.com](mailto:huangshaojun1975@163.com)

<sup>b</sup> School of Chemistry, University of Bristol, Bristol, England BS8 1TS, UK. E-mail: [yaozu.liao@gmail.com](mailto:yaozu.liao@gmail.com)

<sup>c</sup> State Key Laboratory of Theoretical and Computational Chemistry, Institute of Theoretical Chemistry, Jilin University, Changchun, 130023, China

<sup>d</sup> School of Materials Science and Engineering, University of Shanghai for Science and Technology, Shanghai, 200092, China

**Table S1** Main atomic electron density populations for ACA

| Atom | Electric charge | Atom  | Electric charge |
|------|-----------------|-------|-----------------|
| C(2) | -0.26599        | C(8)  | -0.19096        |
| C(3) | -0.19184        | N(1)  | -0.79399        |
| C(4) | -0.22077        | O(9)  | -0.59980        |
| C(6) | -0.22813        | O(10) | -0.52374        |
| C(7) | -0.20445        | Cl(5) | 0.04223         |

**Table S2** Main composition and proportion of frontier orbitals in ACA (%)

| Atom  | HOMO-1 | HOMO | LUMO | LUMO+1 |
|-------|--------|------|------|--------|
| C(2)  | 0.1    | 12.6 | 5.6  | 0.9    |
| C(3)  | 0.3    | 0.5  | 4.1  | 3.4    |
| C(4)  | 2.5    | 18.5 | 3.7  | 4.6    |
| C(6)  | 0.9    | 0.4  | 4.0  | 6.7    |
| C(7)  | 0.2    | 0.0  | 4.8  | 5.6    |
| C(8)  | 1.4    | 0.4  | 1.5  | 18.0   |
| N(1)  | 0.5    | 36.5 | 1.9  | 3.5    |
| O(9)  | 5.0    | 4.0  | 13.9 | 4.6    |
| O(10) | 40.9   | 2.6  | 15.4 | 5.4    |
| Cl(5) | 12.5   | 0.1  | 0.7  | 3.1    |

**Table S3** Main atomic electron spin densities for ACA

| Atom | Electron spin density | Atom  | Electron spin density |
|------|-----------------------|-------|-----------------------|
| C(2) | 0.221341              | C(8)  | 0.025446              |
| C(3) | -0.127492             | N(1)  | 0.408262              |
| C(4) | 0.345231              | O(9)  | 0.014812              |
| C(6) | 0.030662              | O(10) | 0.006762              |
| C(7) | -0.012947             | Cl(5) | 0.014604              |

Table S4 Main atomic electron density populations for PACA molecule with 10 repeating units

| Atom  | Electric charge | Atom  | Electric charge | Atom   | Electric charge | Atom   | Electric charge | Atom   | Electric charge | Atom  | Electric charge |
|-------|-----------------|-------|-----------------|--------|-----------------|--------|-----------------|--------|-----------------|-------|-----------------|
| C 1   | -0.08981        | C 42  | -0.18812        | C 83   | 0.24365         | O 124  | -0.55597        | C 165  | -0.14971        | H 206 | 0.25766         |
| C 2   | -0.1226         | C 43  | 0.53067         | C 84   | -0.24829        | Cl 125 | 0.03925         | C 166  | -0.09513        | H 207 | 0.2482          |
| C 3   | -0.00855        | C 44  | -0.14444        | C 85   | -0.20805        | N 126  | -0.57923        | C 167  | -0.20245        | H 208 | 0.26595         |
| C 4   | -0.22971        | C 45  | -0.10907        | C 86   | 0.16566         | N 127  | -0.58183        | C 168  | -0.19933        | H 209 | 0.24729         |
| C 5   | -0.20856        | C 46  | 0.54114         | O 87   | -0.53283        | C 128  | 0.21493         | C 169  | -0.24904        | H 210 | 0.24987         |
| C 6   | -0.19134        | C 47  | 0.2132          | O 88   | -0.59264        | C 129  | -0.14383        | C 170  | 0.53197         | H 211 | 0.46021         |
| C 7   | 0.52461         | C 48  | -0.24382        | Cl 89  | 0.03822         | C 130  | -0.11197        | C 171  | -0.09593        | H 212 | 0.48147         |
| C 8   | -0.17487        | C 49  | -0.21582        | N 90   | -0.61196        | C 131  | 0.17196         | C 172  | -0.13543        | H 213 | 0.24778         |
| C 9   | -0.11759        | C 50  | 0.16832         | N 91   | -0.58351        | C 132  | -0.22378        | C 173  | 0.55157         | H 214 | 0.24975         |
| C 10  | 0.53224         | O 51  | -0.53076        | C 92   | 0.21144         | C 133  | -0.24759        | C 174  | -0.18624        | H 215 | 0.26687         |
| C 11  | 0.23281         | O 52  | -0.55788        | C 93   | -0.14383        | C 134  | 0.53019         | C 175  | -0.19747        | H 216 | 0.24823         |
| C 12  | -0.2415         | Cl 53 | 0.03793         | C 94   | -0.1223         | C 135  | -0.09267        | C 176  | -0.22239        | H 217 | 0.25738         |
| C 13  | -0.21929        | N 54  | -0.57814        | C 95   | 0.18316         | C 136  | -0.12586        | C 177  | -0.00661        | H 218 | 0.25835         |
| C 14  | 0.16591         | N 55  | -0.58691        | C 96   | -0.23161        | C 137  | 0.53782         | O 178  | -0.54774        | H 219 | 0.24952         |
| O 15  | -0.54332        | C 56  | 0.23071         | C 97   | -0.23908        | C 138  | -0.18706        | O 179  | -0.56887        | H 220 | 0.26803         |
| O 16  | -0.60273        | C 57  | -0.15665        | C 98   | 0.52957         | C 139  | -0.2044         | Cl 180 | 0.05095         | H 221 | 0.2518          |
| Cl 17 | 0.03574         | C 58  | -0.10005        | C 99   | -0.09194        | C 140  | -0.22639        | H 181  | 0.25627         | H 222 | 0.25086         |
| N 18  | -0.7891         | C 59  | 0.14142         | C 100  | -0.12303        | C 141  | -0.00818        | H 182  | 0.24625         | H 223 | 0.48165         |
| N 19  | -0.58041        | C 60  | -0.19731        | C 101  | 0.53415         | O 142  | -0.5334         | H 183  | 0.26451         | H 224 | 0.48228         |
| C 20  | 0.20653         | C 61  | -0.25754        | C 102  | -0.18853        | O 143  | -0.56006        | H 184  | 0.24457         | H 225 | 0.25231         |
| C 21  | -0.14355        | C 62  | 0.53126         | C 103  | -0.20654        | Cl 144 | 0.03874         | H 185  | 0.24754         | H 226 | 0.252           |
| C 22  | -0.1251         | C 63  | -0.09107        | C 104  | -0.22815        | C 145  | -0.08831        | H 186  | 0.42732         | H 227 | 0.26826         |
| C 23  | 0.19016         | C 64  | -0.12829        | C 105  | -0.00859        | C 146  | -0.12835        | H 187  | 0.44334         | H 228 | 0.24975         |
| C 24  | -0.23034        | C 65  | 0.54499         | O 106  | -0.53866        | C 147  | -0.00622        | H 188  | 0.48205         | H 229 | 0.25853         |
| C 25  | -0.23696        | C 66  | -0.18904        | O 107  | -0.56528        | C 148  | -0.22623        | H 189  | 0.25156         | H 230 | 0.26034         |
| C 26  | 0.5276          | C 67  | -0.20597        | Cl 108 | 0.03674         | C 149  | -0.19996        | H 190  | 0.253           | H 231 | 0.25085         |
| C 27  | -0.09228        | C 68  | -0.22794        | C 109  | -0.09288        | C 150  | -0.1854         | H 191  | 0.26645         | H 232 | 0.27068         |
| C 28  | -0.1226         | C 69  | -0.01085        | C 110  | -0.12529        | C 151  | 0.52406         | H 192  | 0.24739         | H 233 | 0.25339         |
| C 29  | 0.53271         | O 70  | -0.51049        | C 111  | -0.0084         | C 152  | -0.14475        | H 193  | 0.2567          | H 234 | 0.25299         |
| C 30  | -0.18988        | O 71  | -0.56247        | C 112  | -0.22661        | C 153  | -0.128          | H 194  | 0.25777         | H 235 | 0.48315         |
| C 31  | -0.20796        | Cl 72 | 0.03834         | C 113  | -0.20474        | C 154  | 0.53987         | H 195  | 0.24873         | H 236 | 0.47674         |
| C 32  | -0.22945        | C 73  | -0.09197        | C 114  | -0.18721        | C 155  | 0.21602         | H 196  | 0.26781         | H 237 | 0.26177         |
| C 33  | -0.00904        | C 74  | -0.12126        | C 115  | 0.53074         | C 156  | -0.2355         | H 197  | 0.26381         | H 238 | 0.24778         |
| O 34  | -0.53997        | C 75  | -0.00882        | C 116  | -0.13862        | C 157  | -0.2314         | H 198  | 0.26596         | H 239 | 0.25282         |
| O 35  | -0.56707        | C 76  | -0.22597        | C 117  | -0.116          | C 158  | 0.19527         | H 199  | 0.48114         | H 240 | 0.26986         |
| Cl 36 | 0.03695         | C 77  | -0.20732        | C 118  | 0.53773         | O 159  | -0.58788        | H 200  | 0.47849         | H 241 | 0.25354         |
| C 37  | -0.09178        | C 78  | -0.18747        | C 119  | 0.20857         | O 160  | -0.56873        | H 201  | 0.25026         | H 242 | 0.2628          |
| C 38  | -0.12623        | C 79  | 0.5365          | C 120  | -0.24424        | Cl 161 | 0.04007         | H 202  | 0.25111         |       |                 |
| C 39  | -0.00847        | C 80  | -0.14686        | C 121  | -0.22867        | N 162  | -0.57783        | H 203  | 0.26693         |       |                 |
| C 40  | -0.22741        | C 81  | -0.10676        | C 122  | 0.17886         | N 163  | -0.57716        | H 204  | 0.24866         |       |                 |
| C 41  | -0.20531        | C 82  | 0.5372          | O 123  | -0.53386        | C 164  | 0.21327         | H 205  | 0.25779         |       |                 |

**Table S5** Solubility and solution color of ACA monomer and PACA prepared with an initial ACA concentration of 142.9 mmol/L and a CrO<sub>3</sub>/ACA molar ratio of 2.0 in a 250 mmol/L of HClO<sub>4</sub> biphasic system of C<sub>6</sub>H<sub>5</sub>NO<sub>2</sub>/H<sub>2</sub>O (6:1, v/v) at 20 °C for 72 h.

|              | Solubility <sup>a</sup> and solution color <sup>b</sup> |         |         |         |       |           |            |
|--------------|---------------------------------------------------------|---------|---------|---------|-------|-----------|------------|
|              | THF                                                     | DMF     | NMP     | DMSO    | Water | 0.5 M HCl | 0.5 M NaOH |
| PACA polymer | WS (lc)                                                 | PS (dc) | PS (dc) | PS (dc) | IS    | IS        | IS         |
| ACA monomer  | S (or)                                                  | S (rb)  | S (rb)  | S (rb)  | IS    | IS        | IS         |

<sup>a</sup> Solubility: IS–insoluble, WS–weakly soluble, PS–partially soluble, S–soluble; <sup>b</sup> Solution color: rb–reddish brown, or–orange red, dc–dark cyan, lc–light cyan.

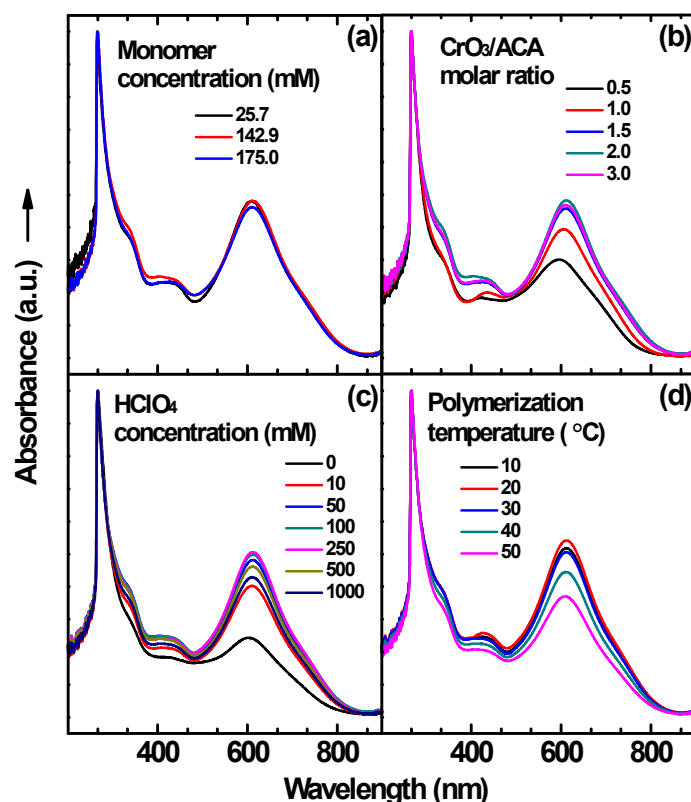

**Fig. S1** Normalized UV–vis absorption spectra of PACAs prepared with (a) different initial ACA concentrations and a CrO<sub>3</sub>/ACA molar ratio of 2.0 in a 50 mmol/L HClO<sub>4</sub> biphasic system of C<sub>6</sub>H<sub>5</sub>NO<sub>2</sub>/H<sub>2</sub>O (6:1, v/v) at 30 °C for 72 h; (b) an initial ACA concentration of 142.9 mmol/L and different CrO<sub>3</sub>/ACA molar ratios in a 50 mmol/L HClO<sub>4</sub> biphasic system of C<sub>6</sub>H<sub>5</sub>NO<sub>2</sub>/H<sub>2</sub>O (6:1, v/v) at 30 °C for 72 h; (c) an initial ACA concentration of 142.9 mmol/L and a CrO<sub>3</sub>/ACA molar ratio of 2.0 in a biphasic system of C<sub>6</sub>H<sub>5</sub>NO<sub>2</sub>/H<sub>2</sub>O (6:1, v/v) containing different concentrations of HClO<sub>4</sub> at 30 °C for 72 h; and (d) an initial ACA concentration of 142.9 mmol/L and a CrO<sub>3</sub>/ACA molar ratio of 2.0 in a 250 mmol/L HClO<sub>4</sub> biphasic system of C<sub>6</sub>H<sub>5</sub>NO<sub>2</sub>/H<sub>2</sub>O (6:1, v/v) at different temperatures for 72 h. DMF was used as solvent for UV-vis spectral tests.

**Fig. S2** Dispersions of the PACA nanofibrils upon adding NaCl electrolyte after standing for 24 h.

**Fig. S3** Pictures of ACA powders, PACA powders and resultant coke made from PACA.
